# Supplementary material for: Microarray and RNAi Analysis of P450s in Anopheles gambiae Male and Female Steroidogenic Tissues: CYP307A1 Is Required for Ecdysteroid Synthesis
Source: PLoS One. 2013 Dec 4;8(12):e79861. doi: 10.1371/journal.pone.0079861 (PMC3851169; doi:10.1371/journal.pone.0079861)
Supplement: Table S1 — Primers used in the study. (XLS) [file pone.0079861.s001.xls]

## Sheet: Feuil1
		Primer Up	Primer Down
mRNA expression analysis	CYP307A1	GGAATAACTCGCTCGCACTA	ACTGCTGCTGCTGTTACTAC
	CYP6N1	CGAAAATGGGGATTCATTTGCTTGT	GATGGTGGACTTTGGTTAAA
	CYP4G16	GGTGTTAACGAAACAACATGGC	CCAATCCTCATAATGTCTTCGA
	rpS7	AGGCGATCATCATCTACGTGC	GTAGCTGCTGCAAACTTCGG
Gene cloning	CYP314A1	TGACCACCCAGTATCACTCT	TATTAGGAAGCGGGTGATGC
	CYP307A1	TGCGGTCAGTTCTTTTGTTG	ACTGCTGCTGCTGTTACTAC
	CYP6N1	GAACAGCATCCGAAAATGGG	GATGGTGGACTTTGGTTAAA
	CYP4G16	GGTGTTAACGAAACAACATGGC	CCAATCCTCATAATGTCTTCGA
	Egfp	ATGGTGAGCAAGGGCGAG	TTACTTGTACAGCTCGTC
dsRNA synthesis	CYP314A1	T7P-CAACCCGAAGCCGAAGAAGA	T7P-ACACGAACGACTCCTTGACC
	CYP307A1	T7P-ACTACAACGACCAGGGATTT	T7P-TGTTGGCGATGATGATGAAG
	Egfp	T7P-ATGGTGAGCAAGGGCGAG	T7P-TTACTTGTACAGCTCGTC
mRNA expression analysis	CYP314A1	ACGCTATCCAACACGCTCTC	GGTAGAGGGGAACGCCACT
in RNAi experiments	CYP307A1	GGAATAACTCGCTCGCACTA	ACTGCTGCTGCTGTTACTAC
T7P= T7 - purine tail: TAATACGACTCACTATAGGGAGA
